# Supplementary material for: Investigating Vitreous Cytokines in Choroidal Melanoma
Source: MDPI journal article supplement (doi:10.3390/cancers15143701), 2023-07-21
Supplement: s1 [file cancers-2442556-supplementary.pdf › cancers-2442556-supplementary.pdf]

**Table S1.** Comparison of vitreous cytokine measures between choroidal melanoma (CM) and non-CM (control) groups.

| Cytokine <sup>1</sup>                                          | Melanoma (n=18)              | Control (n=14)               | Comparison                   |
|----------------------------------------------------------------|------------------------------|------------------------------|------------------------------|
|                                                                | Median (IQR)                 | Median (IQR)                 | <i>p</i> -Value <sup>2</sup> |
| Macrophage inflammatory protein 1-alpha (MIP-1 $\alpha$ /CCL3) | 70.96 (58.60-82.09)          | 22.58 (18.59-24.45)          | <0.0001                      |
| Epidermal growth factor (EGF)                                  | 28.18 (27.61-30.38)          | 19.31 (17.23-20.23)          | <0.0001                      |
| Interleukin-9 (IL-9)                                           | 17.51 (16.40-18.96)          | 13.14 (11.78-13.98)          | <0.0001                      |
| Interferon gamma (IFN- $\gamma$ )                              | 18.48 (17.01-19.71)          | 13.82 (12.19-14.47)          | <0.0001                      |
| Interleukin-4 (IL-4)                                           | 19.52 (18.25-20.20)          | 14.51 (14.12-16.55)          | <0.0001                      |
| Interleukin-10 (IL-10)                                         | 21.80 (20.33-25.64)          | 16.98 (16.02-17.52)          | <0.0001                      |
| Monocyte chemoattractant protein 3 (MCP-3/CCL7)                | 12.71 (11.48-13.37)          | 8.19 (7.80-8.55)             | <0.0001                      |
| Platelet-derived growth factor A (PDGF-AA)                     | 2587.72 (1559.41-4863.03)    | 1047.09 (978.15-1119.50)     | <0.0001                      |
| Vascular endothelial growth factor (VEGF)                      | 17.63 (15.81-35.14)          | 12.46 (11.29-13.72)          | <0.0001                      |
| Granulocyte-macrophage colony-stimulating factor (GM-CSF)      | 24.77 (23.95-26.42)          | 21.19 (19.53-21.65)          | <0.0001                      |
| Monocyte chemoattractant protein 1 (MCP-1/CCL2)                | 21725.98 (19970.48-22728.88) | 12873.77 (11476.59-16450.78) | <0.0001                      |
| Macrophage inflammatory protein 1-beta (MIP-1 $\beta$ /CCL4)   | 27.03 (24.13-35.82)          | 17.77 (14.96-20.44)          | <0.0001                      |
| Interleukin-12 (IL-12p40)                                      | 16.84 (16.28-18.32)          | 13.45 (12.60-14.39)          | <0.0001                      |
| Tumor necrosis factor alpha (TNF- $\alpha$ )                   | 30.08 (28.53-32.44)          | 24.91 (19.71-25.56)          | <0.0001                      |
| Eotaxin (CCL11)                                                | 25.80 (22.34-29.95)          | 18.09 (16.48-20.24)          | <0.0001                      |
| Interleukin-17A (IL-17A)                                       | 15.24 (14.33-16.19)          | 12.71 (12.43-13.12)          | <0.0001                      |
| Interleukin-6 (IL-6)                                           | 244.77 (108.99-426.93)       | 45.21 (35.59-63.36)          | 0.0001                       |
| Interleukin-3 (IL-3)                                           | 36.27 (33.20-40.42)          | 24.08 (23.03-25.51)          | 0.0002                       |
| Interleukin-12 (IL-12p70)                                      | 13.92 (12.74-15.10)          | 10.34 (9.97-12.45)           | 0.0003                       |
| Interferon gamma-induced protein-10 (IP-10/CXCL10)             | 4107.64 (1724.99-10444.72)   | 561.20 (382.85-862.85)       | 0.0003                       |
| Interleukin-13 (IL-13)                                         | 12.43 (11.07-14.26)          | 9.56 (8.60-11.18)            | 0.0006                       |
| Interleukin-7 (IL-7)                                           | 44.33 (31.10-54.94)          | 20.66 (18.60-25.39)          | 0.0008                       |
| Growth-regulated alpha protein (GRO/CXCL1)                     | 79.62 (65.95-130.50)         | 62.24 (24.72-69.26)          | 0.0041                       |
| Fractalkine (CX3CL1)                                           | 14.25 (12.94-16.75)          | 12.50 (9.75-13.28)           | 0.0175                       |
| Platelet-derived growth factor B (PDGF-AB/BB)                  | 16.14 (13.53-19.52)          | 8.28 (7.02-18.84)            | 0.0262                       |
| Interleukin-15 (IL-15)                                         | 72.54 (61.88-90.82)          | 56.32 (43.43-70.76)          | 0.0275                       |
| Fms-like tyrosine kinase-3 ligand (Flt-3L)                     | 36.49 (17.58-63.44)          | 19.86 (16.90-24.75)          | 0.1064                       |
| Fibroblast growth factor-2 (FGF-2)                             | 13.09 (11.68-15.28)          | 10.81 (8.67-13.09)           | 0.1149                       |
| Interleukin-1 alpha (IL-1 $\alpha$ )                           | 38.14 (35.94-41.86)          | 26.29 (23.08-64.99)          | 0.1239                       |
| Interferon alpha-2 (IFN- $\alpha$ 2)                           | 13.63 (12.18-15.18)          | 14.93 (14.41-15.78)          | 0.1435                       |

|                                                                                |                        |                        |        |
|--------------------------------------------------------------------------------|------------------------|------------------------|--------|
| Granulocyte colony-stimulating factor (G-CSF)                                  | 15.36 (12.43-20.96)    | 13.12 (10.77-14.95)    | 0.1542 |
| Transforming growth factor-alpha (TGF- $\alpha$ )                              | 28.52 (21.73-35.61)    | 25.07 (17.14-29.10)    | 0.1543 |
| Interleukin-2 (IL-2)                                                           | 12.37 (11.39-13.76)    | 10.44 (9.67-24.47)     | 0.2464 |
| Interleukin-8 (IL-8)                                                           | 249.65 (101.46-574.06) | 133.70 (105.60-178.13) | 0.2666 |
| Tumor necrosis factor beta (TNF- $\beta$ )                                     | 9.97 (9.49-10.91)      | 10.42 (9.23-29.51)     | 0.2960 |
| Soluble CD40 ligand (sCD40L)                                                   | 9.90 (9.25-10.77)      | 8.29 (7.64-110.77)     | 0.3518 |
| Interleukin-5 (IL-5)                                                           | 8.77 (8.07-9.65)       | 7.74 (6.95-12.93)      | 0.3716 |
| Interleukin-1 receptor antagonist protein (IL-1RA)                             | 26.10 (15.26-34.12)    | 15.36 (10.90-90.91)    | 0.4361 |
| Interleukin-1 beta (IL-1 $\beta$ )                                             | 10.71 (9.48-11.55)     | 10.87 (8.90-19.39)     | 0.6347 |
| Macrophage-derived chemokine (MDC/ADAM11)                                      | 15.86 (8.71-69.74)     | 15.20 (11.64-21.95)    | 0.7757 |
| Regulated upon Activation, Normal T cell Expressed, and Secreted (RANTES/CCL5) | 13.98 (12.43-20.76)    | 16.50 (9.63-17.19)     | 0.8344 |

<sup>1</sup>Vitreous cytokine levels are based on the MFI (median fluorescence intensity) values that were extracted/used for relative quantification of the cytokine abundance (see Methods); IQR, interquartile range.

<sup>2</sup>The *p*-values were determined by the Wilcoxon rank sum test and are shown as rounded to four decimal places. Cytokines are ordered based on corresponding *p*-values. All observed associations remained significant also after correcting for multiple comparisons using the Benjamini-Hochberg method (adj. *P* < 0.05).

**Table S2.** Comparison of vitreous cytokine measures between different tumor GEP-defined prognostic classes/groups.<sup>1</sup>

| Cytokine <sup>2</sup>                                     | Class 1 (n=11)            | Class 2 (n=7)              | Comparison                   |
|-----------------------------------------------------------|---------------------------|----------------------------|------------------------------|
|                                                           | Median (IQR)              | Median (IQR)               | <i>p</i> -Value <sup>3</sup> |
| Platelet-derived growth factor B (PDGF-AB/BB)             | 12.00 (11.59-13.92)       | 22.50 (16.66-24.09)        | 0.0075                       |
| Granulocyte colony-stimulating factor (G-CSF)             | 13.67 (13.16-17.00)       | 23.67 (17.59-30.91)        | 0.0098                       |
| Interleukin-3 (IL-3)                                      | 45.83 (42.25-50.66)       | 38.67 (25.58-39.84)        | 0.0127                       |
| Monocyte chemoattractant protein 3 (MCP-3/CCL7)           | 12.67 (10.67-12.92)       | 13.67 (13.09-14.83)        | 0.0161                       |
| Interleukin-13 (IL-13)                                    | 12.67 (12.09-14.59)       | 16.33 (14.59-16.33)        | 0.0232                       |
| Tumor necrosis factor beta (TNF- $\beta$ )                | 13.67 (12.66-14.09)       | 15.67 (14.50-16.16)        | 0.0459                       |
| Transforming growth factor-alpha (TGF- $\alpha$ )         | 24.83 (22.75-32.17)       | 44.00 (33.17-54.17)        | 0.0514                       |
| Interleukin-4 (IL-4)                                      | 20.67 (19.42-21.33)       | 22.00 (21.34-23.00)        | 0.0565                       |
| Vascular endothelial growth factor (VEGF)                 | 15.00 (14.16-16.58)       | 83.33 (20.25-342.00)       | 0.0571                       |
| Granulocyte-macrophage colony-stimulating factor (GM-CSF) | 27.33 (26.34-30.25)       | 26.00 (23.66-26.50)        | 0.0772                       |
| Fractalkine (CX3CL1)                                      | 12.50 (11.59-13.75)       | 15.50 (12.41-17.16)        | 0.1029                       |
| Epidermal growth factor (EGF)                             | 24.83 (23.91-25.59)       | 27.17 (25.58-27.34)        | 0.1227                       |
| Interferon gamma-induced protein-10 (IP-10/CXCL10)        | 2168.00 (1754.00-5928.50) | 9995.00 (5352.50-16651.00) | 0.1259                       |
| Interleukin-1 alpha (IL-1 $\alpha$ )                      | 48.33 (45.16-54.42)       | 45.50 (42.42-47.66)        | 0.1469                       |
| Interleukin-6 (IL-6)                                      | 169.83 (122.83-394.75)    | 468.00 (362.75-611.92)     | 0.1471                       |

|                                                                                |                              |                              |        |
|--------------------------------------------------------------------------------|------------------------------|------------------------------|--------|
| Soluble CD40 ligand (sCD40L)                                                   | 14.33 (13.00-15.00)          | 15.33 (14.34-16.33)          | 0.1882 |
| Interleukin-9 (IL-9)                                                           | 17.17 (16.59-18.08)          | 19.33 (17.25-21.33)          | 0.2381 |
| Interleukin-12 (IL-12p40)                                                      | 17.50 (16.84-18.91)          | 17.67 (17.50-19.59)          | 0.2764 |
| Interferon gamma (IFN- $\gamma$ )                                              | 18.33 (17.33-19.16)          | 19.17 (18.09-21.92)          | 0.2971 |
| Monocyte chemoattractant protein 1 (MCP-1/CCL2)                                | 24917.00 (21116.50-26612.50) | 26322.00 (24926.00-26783.00) | 0.3283 |
| Macrophage inflammatory protein 1-alpha (MIP-1 $\alpha$ /CCL3)                 | 75.00 (66.08-81.42)          | 58.83 (54.66-87.09)          | 0.3283 |
| Interleukin-2 (IL-2)                                                           | 16.00 (15.09-18.09)          | 18.00 (15.34-21.41)          | 0.3644 |
| Eotaxin (CCL11)                                                                | 25.83 (23.50-32.83)          | 30.00 (26.25-38.50)          | 0.3649 |
| Macrophage inflammatory protein 1-beta (MIP-1 $\beta$ /CCL4)                   | 31.50 (26.25-36.34)          | 31.33 (30.00-57.58)          | 0.4409 |
| Interleukin-17A (IL-17A)                                                       | 16.67 (15.67-17.41)          | 17.33 (16.50-17.84)          | 0.4963 |
| Platelet-derived growth factor A (PDGF-AA)                                     | 2300.00 (1538.50-4206.00)    | 2679.00 (1925.50-6299.50)    | 0.5360 |
| Interleukin-12 (IL-12p70)                                                      | 14.50 (13.66-15.59)          | 15.67 (13.83-16.09)          | 0.5857 |
| Interleukin-15 (IL-15)                                                         | 89.50 (80.59-107.33)         | 102.67 (81.84-160.58)        | 0.5962 |
| Interleukin-10 (IL-10)                                                         | 22.67 (20.41-25.00)          | 21.67 (21.59-35.34)          | 0.6179 |
| Fms-like tyrosine kinase-3 ligand (Flt-3L)                                     | 45.00 (29.91-77.00)          | 50.50 (12.16-75.66)          | 0.6590 |
| Growth-regulated alpha protein (GRO/CXCL1)                                     | 30.67 (26.75-50.16)          | 35.83 (28.42-63.08)          | 0.6590 |
| Interleukin-1 receptor antagonist protein (IL-1RA)                             | 42.17 (24.59-48.00)          | 32.67 (16.59-236.25)         | 0.6590 |
| Interferon alpha-2 (IFN- $\alpha$ 2)                                           | 18.17 (16.58-19.75)          | 19.50 (16.66-21.50)          | 0.6834 |
| Tumor necrosis factor alpha (TNF- $\alpha$ )                                   | 33.33 (32.25-35.42)          | 32.83 (30.59-37.08)          | 0.6834 |
| Fibroblast growth factor-2 (FGF-2)                                             | 13.17 (11.59-15.09)          | 13.83 (12.16-15.25)          | 0.7169 |
| Interleukin-7 (IL-7)                                                           | 50.33 (31.25-64.00)          | 49.33 (35.92-54.34)          | 0.7242 |
| Interleukin-8 (IL-8)                                                           | 259.83 (125.09-533.66)       | 471.50 (117.25-1075.66)      | 0.7242 |
| Interleukin-1 beta (IL-1 $\beta$ )                                             | 12.67 (11.84-15.00)          | 13.83 (13.67-14.66)          | 0.7508 |
| Interleukin-5 (IL-5)                                                           | 9.67 (8.92-10.25)            | 8.83 (8.67-10.25)            | 0.8558 |
| Regulated upon Activation, Normal T cell Expressed, and Secreted (RANTES/CCL5) | 13.67 (12.50-18.67)          | 14.50 (11.25-45.75)          | 0.9278 |
| Macrophage-derived chemokine (MDC/ADAM11)                                      | 20.67 (15.25-65.16)          | 17.83 (10.34-133.00)         | 0.9639 |

<sup>1</sup>Gene expression profiling (GEP) of the primary tumor was performed using a clinically validated and commercially available 15-gene assay (DecisionDx- UM®) [28] to predict the metastatic risk: Class 1-low risk and Class 2-high risk.

<sup>2</sup>Vitreous cytokine levels are based on the MFI (median fluorescence intensity) values that were extracted/used for relative quantification of the cytokine abundance (see Methods); IQR, interquartile range.

<sup>3</sup>The *p*-values were determined by the Wilcoxon rank sum test and are shown as rounded to four decimal places. Cytokines are ordered based on corresponding *p*-values.

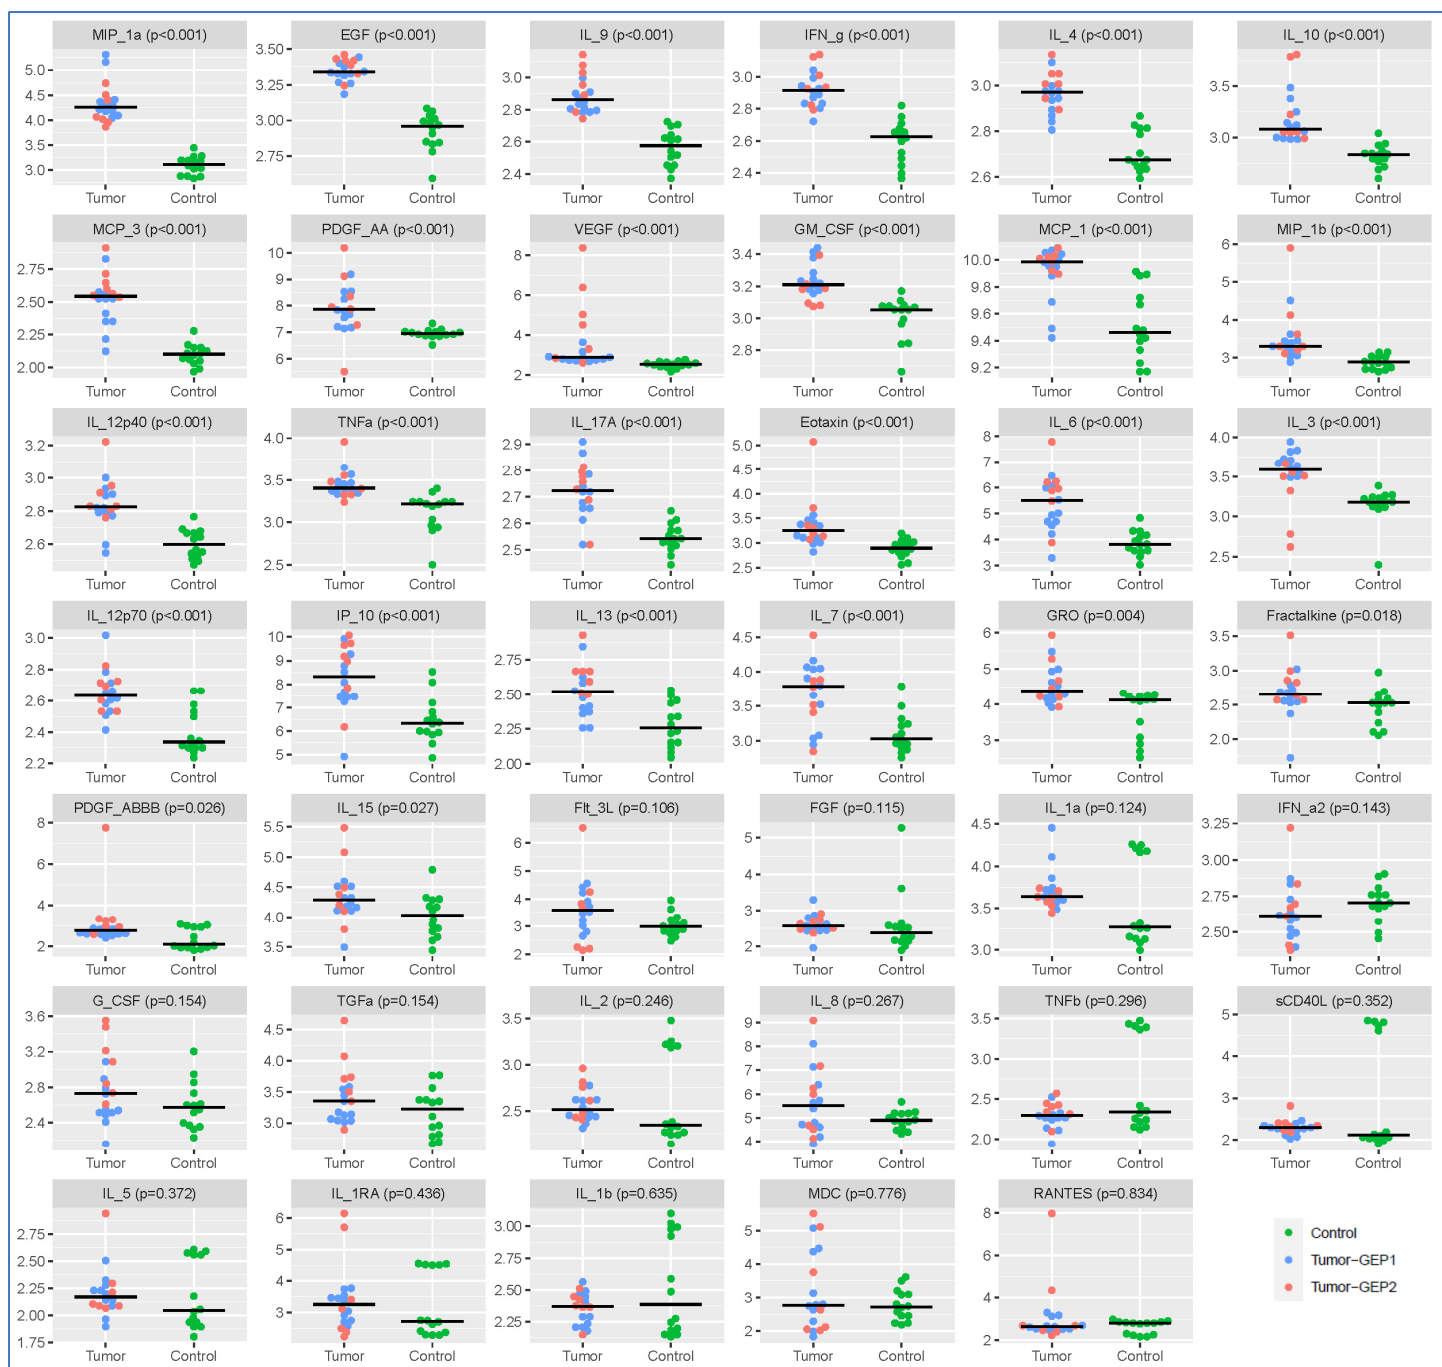

**Figure S1.** Scatter plots of vitreous cytokine measures and the comparison between the choroidal melanoma (CM) and non-CM control groups. The tumor group included 18 CM patients, of which 11 were classified as having Class 1-low risk (GEP1) and 7 as having Class 2-high risk (GEP2) tumors based on the primary tumor biopsy-based gene expression profiling (GEP) test used for metastatic risk prediction (DecisionDx-UM®) [28]. The control group included 14 non-CM patients. Vitreous cytokine levels are based on the MFI (median fluorescence intensity) values that were extracted/used for relative quantification of the cytokine abundance (see Methods) and are displayed here on a logarithmic scale. Horizontal lines are used to indicate the median in each group. The  $p$ -values were determined by the Wilcoxon rank sum test and are shown as rounded to three decimal places. Cytokines are ordered based on corresponding  $p$ -values, from the most to least significant (see **Table S1** for the full names of the cytokines and additional details on CM vs. non-CM group comparison results).

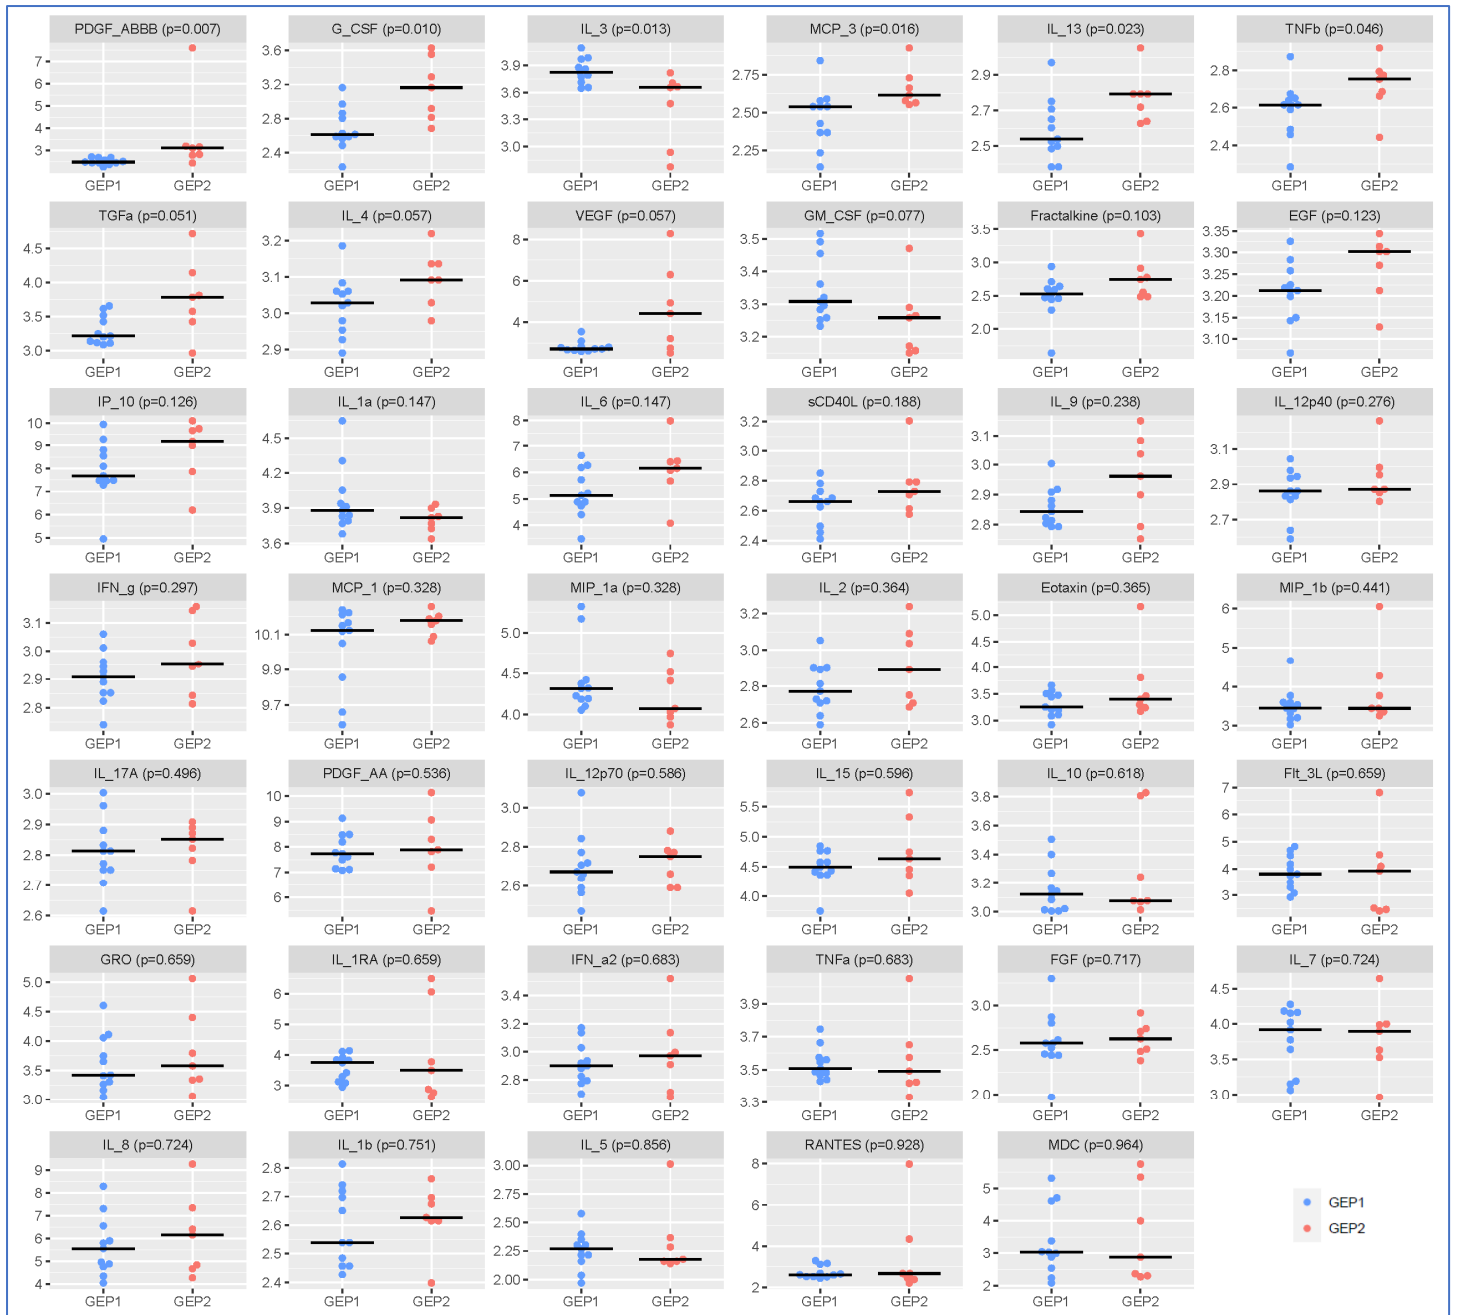

**Figure S2.** Scatter plots of vitreous cytokine measures and the comparison between different prognostic classes within the choroidal melanoma (CM) group. CM group included 18 patients, of which 11 were classified as having Class 1-low risk (GEP1) and 7 as having Class 2-high risk (GEP2) tumors based on the primary tumor biopsy-based gene expression profiling (GEP) test used for metastatic risk prediction (DecisionDx-UM®) [28]. Vitreous cytokine levels are based on the MFI (median fluorescence intensity) values that were extracted/used for relative quantification of the cytokine abundance (see Methods) and are displayed here on a logarithmic scale. Horizontal lines are used to indicate the median in each subgroup. The  $p$ -values were determined by the Wilcoxon rank sum test and are shown as rounded to three decimal places. Cytokines are ordered based on corresponding  $p$ -values, from the most to least significant (see **Table S2** for the full names of the cytokines and additional details on GEP Class 2 vs. Class 1 CM subgroup comparison results).

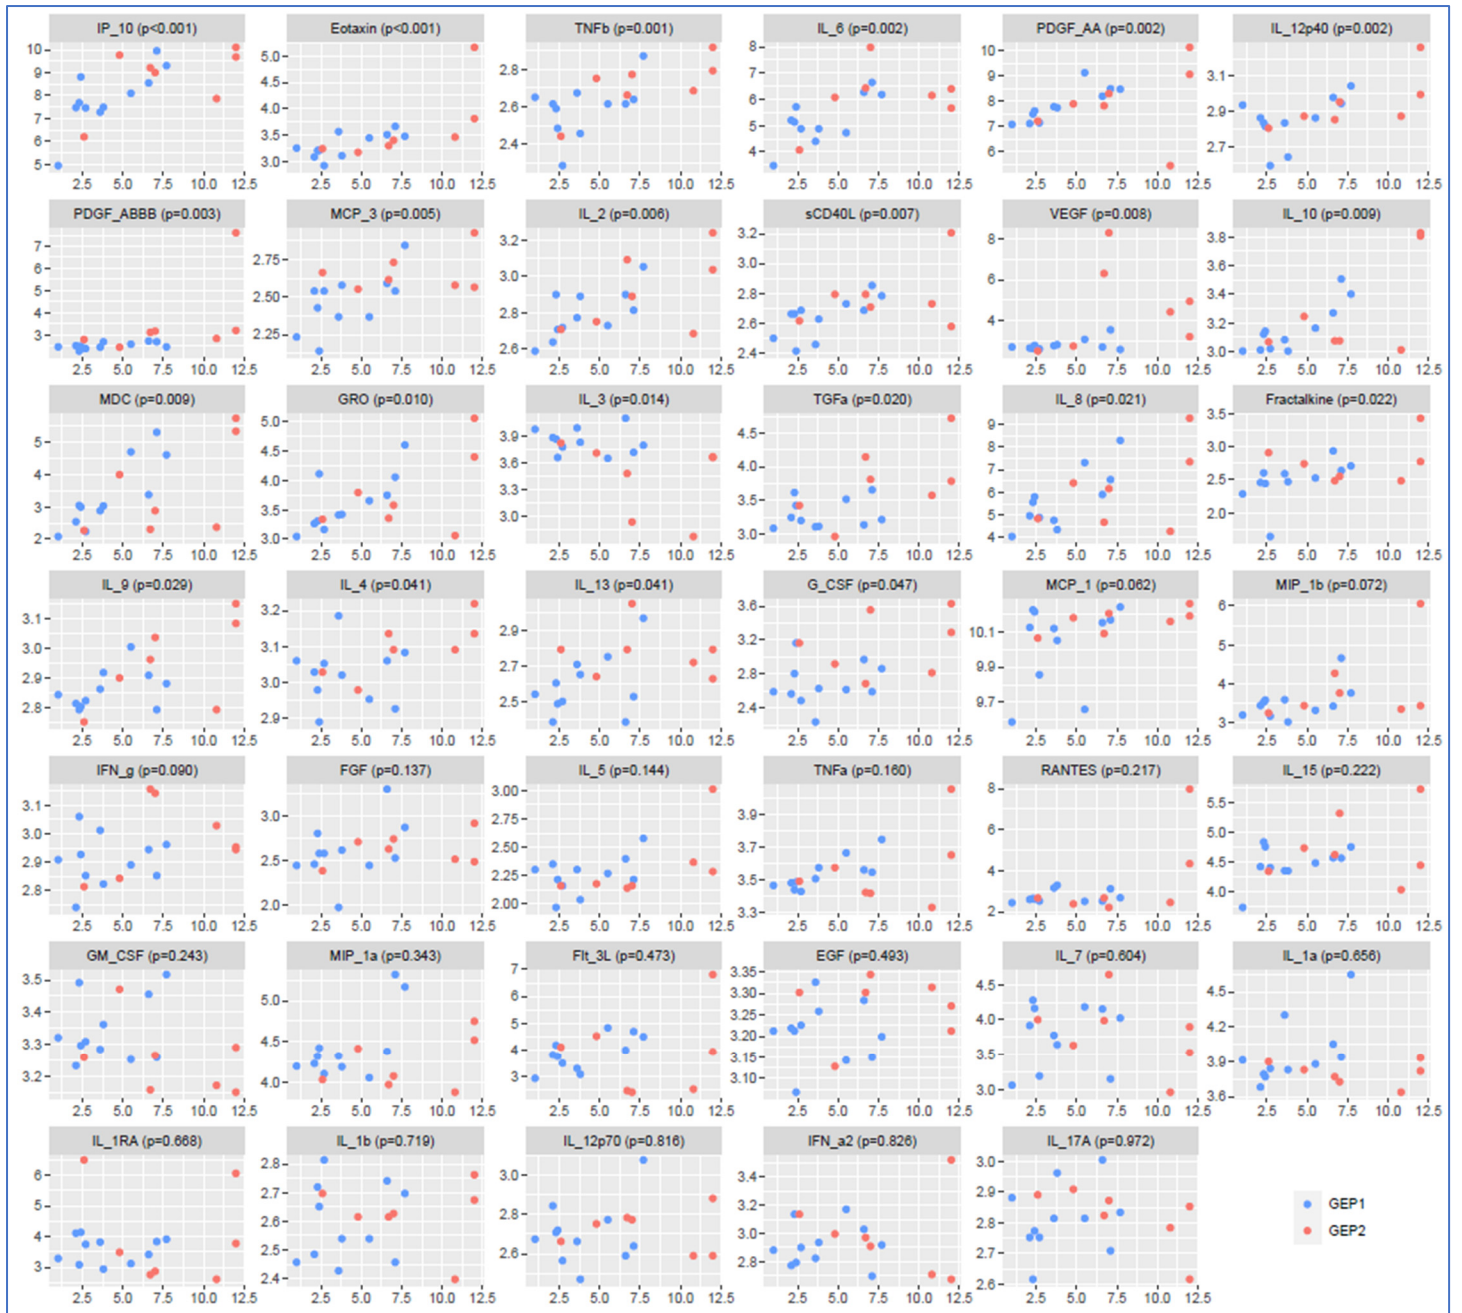

**Figure S3.** Scatter plots showing the correlations between vitreous cytokine measures and the tumor thickness within the choroidal melanoma (CM) group. CM group included 18 patients, of which 11 were classified as having Class 1-low risk (GEP1) and 7 as having Class 2-high risk (GEP2) tumors based on the primary tumor biopsy-based gene expression profiling (GEP) test used for metastatic risk prediction (DecisionDx-UM®) [28]. Vitreous cytokine levels are based on the MFI (median fluorescence intensity) values that were extracted/used for relative quantification of the cytokine abundance (see Methods) and are displayed here on a logarithmic scale (Y-axis). The  $p$ -values were determined by Spearman's rank correlation and are shown as rounded to three decimal places. Cytokines are ordered based on corresponding  $p$ -values, from the most to least significant (see **Table 2** for the full names of the cytokines and additional details on correlations of vitreous cytokine measures with the tumor dimensions).



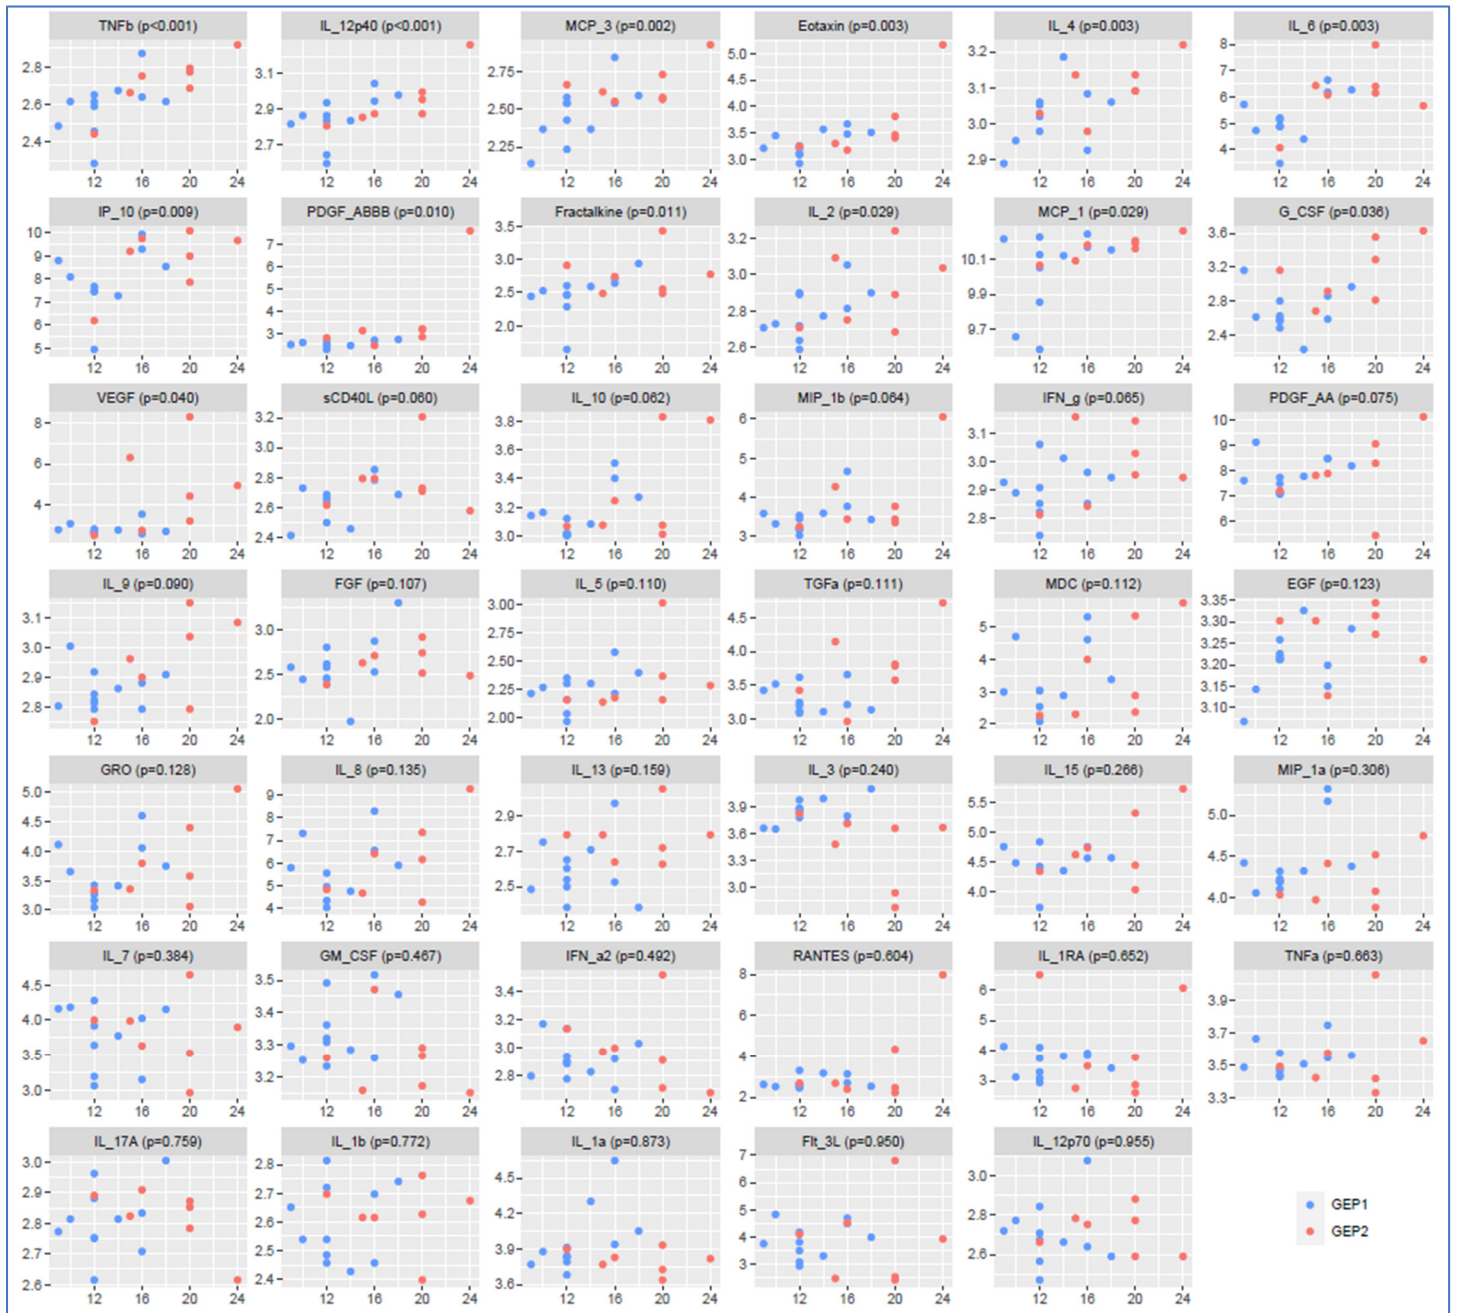

**Figure S4.** Scatter plots showing the correlations between vitreous cytokine measures and the largest tumor basal diameter within the choroidal melanoma (CM) group. CM group included 18 patients, of which 11 were classified as having Class 1-low risk (GEP1) and 7 as having Class 2-high risk (GEP2) tumors based on the primary tumor biopsy-based gene expression profiling (GEP) test used for metastatic risk prediction (DecisionDx-UM®) [28]. Vitreous cytokine levels are based on the MFI (median fluorescence intensity) values that were extracted/used for relative quantification of the cytokine abundance (see Methods) and are displayed here on a logarithmic scale (Y-axis). The  $p$ -values were determined by Spearman's rank correlation and are shown as rounded to three decimal places. Cytokines are ordered based on corresponding  $p$ -values, from the most to least significant (see **Table 2** for the full names of the cytokines and additional details on correlations of vitreous cytokine measures with the tumor dimensions).

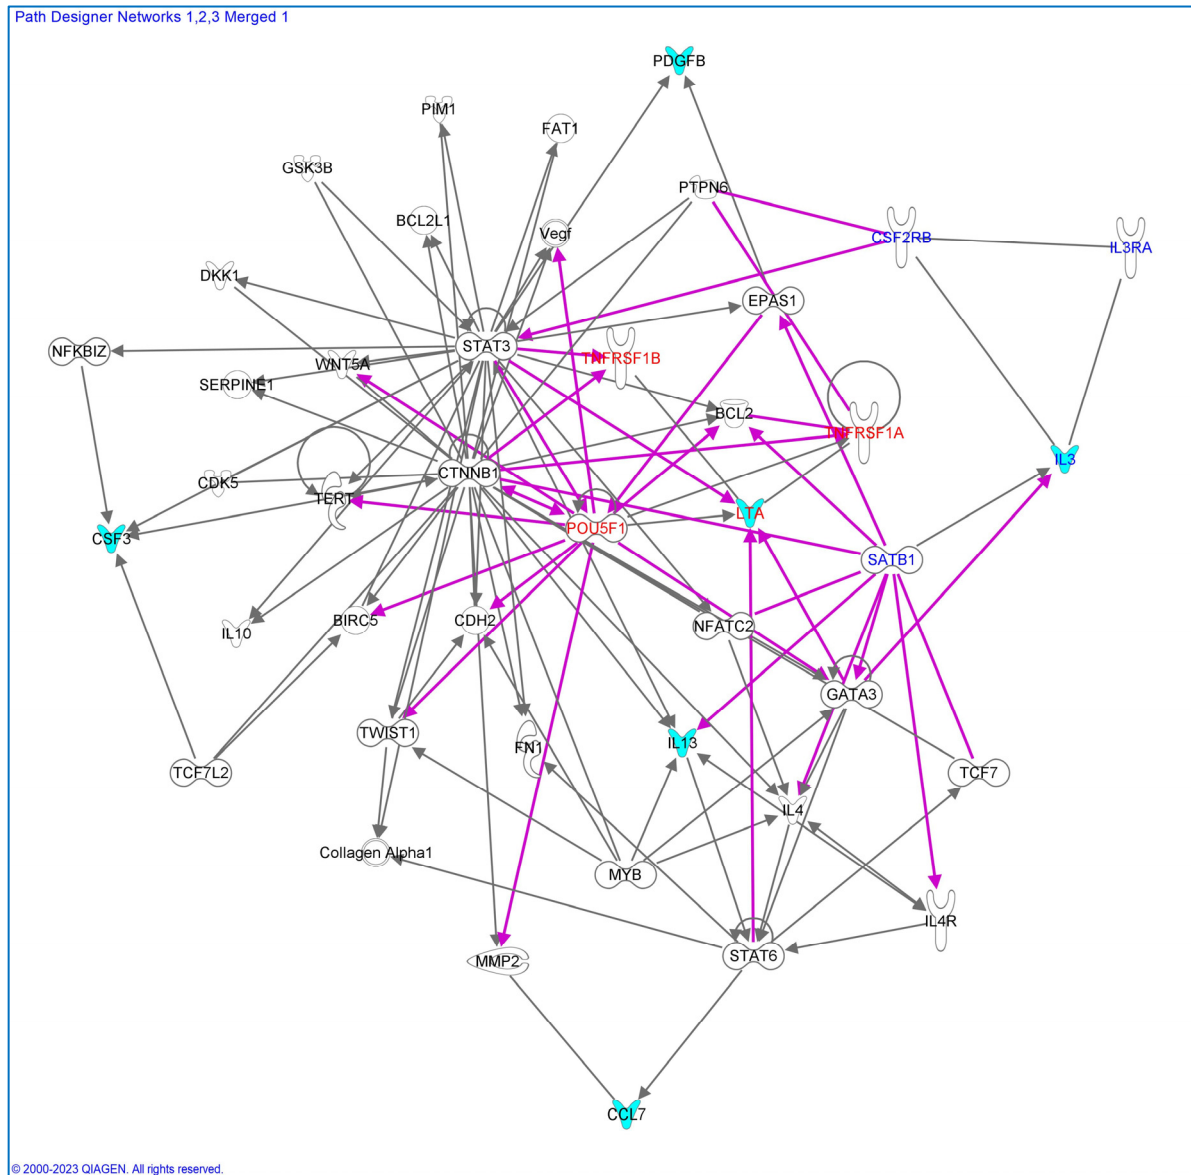

**Figure S5.** A merged version of three biological networks captured by a search in the Ingenuity Knowledge Base of IPA (QIAGEN) for the molecules directly interacting with the vitreous cytokines differentially expressed in eyes with choroidal melanomas (CMs) of different prognostic classes (GEP1: low metastatic risk, GEP2: high metastatic risk). Using six prognostically relevant vitreous cytokines (MCP-3/CCL7, PDGF-AB/BB, TNF- $\beta$ /LTA, G-CSF/CSF3, IL-13, IL-3) as the focus molecules (highlighted in blue) and the information available from human primary cells and tissues for direct interactions, a total of three IPA networks were captured: Network 1 comprising >30 molecules mainly interacting with STAT3 and/or CTNNB1 and including 4 focus cytokines (MCP-3/CCL7, PDGF-AB/BB, G-CSF/CSF3, IL-13) upregulated in the vitreous of GEP2 CMs, 2 vitreous cytokines (IL-4, VEGF) that showed trend for upregulation in GEP2 CMs, and one molecule (SERPINE1) previously shown upregulated in aqueous humor of GEP2 UMs [36]; Network 2 comprising 4 molecules including one focus cytokine (TNF- $\beta$ /LTA) upregulated in the vitreous of GEP2 CMs and two molecules (TNFRSF1A, TNFRSF1B) previously shown upregulated in aqueous humor of GEP2 UMs [36]; Network 3 comprising 4 molecules including one focus cytokine (IL-3) downregulated in the vitreous of GEP2 CMs and a molecule (SATB1) encoded by one of 12 discriminating genes targeted in UM GEP test (one of 8 genes downregulated in GEP2 UMs) (DecisionDx-UM [28,66]). The gray lines indicate direct interactions within a Network whereas the purple lines indicate direct interactions between the Networks.
